# Supplementary material for: Altered Hippocampal Connectivity is Associated With Cognitive Impairment in Migraine Patients
Source: Research Square preprint supplement (doi:10.21203/rs.3.rs-3791716/v1), 2024-01-22
Supplement: Supplementary file 1 [file e5dc039ecb7c921660b0fb6a.docx]

| ANOVAa,b | | | | | | |
| --- | --- | --- | --- | --- | --- | --- |
| Model | | Sum of Squares | df | Mean Square | F | Sig. |
| 1 | Regression | 265.896 | 15 | 17.726 | 2.807 | ,007c |
| Residual | 202.083 | 32 | 6.315 |  |  |
| Total | 467.979 | 47 |  |  |  |
| a. patient no: patient | | | | | | |
| b. Dependent Variable: MOCA | | | | | | |
| c. Predictors: (Constant), education year, +46 -56 +46 rest_L_HATA', -42 +18 -24 rest_L_fimbria', +22 -12 -12 rest_R_CA_3', +40 +26 -6 rest_R_HP_tail', +46 +6 -14 rest_R_CA_3, -54 -60 +30 rest_L_HATA', -2 +28 +36 rest_L_HATA', CONN imported values cluster rest_L_CA_3', age, +38 -84 +6 rest_L_fimbria', +52 +16 -34 rest_L_fimbria', +36 +18 +38 rest_L_HATA', -36 +14 -6 rest_R_HP_tail', -10 -98 +6 rest_L_fimbria' | | | | | | |

Supp. Table 1: The linear regression analysis (Enter method), L-HATA connectivity and education year showed an association with MOCA scores.

| ANOVAa,b | | | | | | |
| --- | --- | --- | --- | --- | --- | --- |
| Model | | Sum of Squares | df | Mean Square | F | Sig. |
| 1 | Regression | 120.414 | 1 | 120.414 | 15.937 | ,000c |
| Residual | 347.566 | 46 | 7.556 |  |  |
| Total | 467.979 | 47 |  |  |  |
| 2 | Regression | 161.030 | 2 | 80.515 | 11.804 | ,000d |
| Residual | 306.949 | 45 | 6.821 |  |  |
| Total | 467.979 | 47 |  |  |  |
| a. patient no: patient | | | | | | |
| b. Dependent Variable: MOCA | | | | | | |
| c. Predictors: (Constant), education year | | | | | | |
| d. Predictors: (Constant), education year, +36 +18 +38 rest_L_HATA' | | | | | | |

Supp. Table 2: The lineer regression, (Stepwise method) L-HATA connectivity and education year showed an association with MOCA scores.

| Model | | Unstandardized Coefficients | | Sig. | 95,0% Confidence Interval for B | |
| --- | --- | --- | --- | --- | --- | --- |
| **B** | **Std. Error** |  |
| 1 | **(Constant)** | 19.257 | 1.457 | 0.000 | 22.190-16.324 |
| **education year** | 0.454 | 0.114 | 0.000 | 0.683-0.225 |
| 2 | **(Constant)** | 19.235 | 1.384 | 0.000 | 22.023-16.446 |
| **education year** | 0.439 | 0.108 | 0.000 | 0.657-0.221 |
| **+36 +18 +38 rest_L_HATA'** | 12.080 | 4.950 | 0.019 | 22.051-2.109 |

Supp. Table 3: In the regression analyses, +36 +18 +38 rest_L_HATA' (β, 13.034; 95% CI, 1.611-24.457; p=0.026 and education year (β, 0,433; 95% CI, 0.205-0.66; p<0.001) showed a univariable association with MOCA scores.

| Model | | Unstandardized Coefficients | | Sig. | 95,0% Confidence Interval for B | |
| --- | --- | --- | --- | --- | --- | --- |
| **B** | **Std. Error** | **Lower Bound** | **Upper Bound** |
| 1 | **(Constant)** | 15.379 | 2.676 | 0.000 | 9.929 | 20.829 |
| **CONN imported values cluster rest_L_CA_3'** | -4.852 | 5.283 | 0.365 | -15.613 | 5.910 |
| **+36 +18 +38 rest_L_HATA'** | 21.700 | 7.639 | 0.008 | 6.139 | 37.261 |
| **-54 -60 +30 rest_L_HATA'** | 1.923 | 4.080 | 0.641 | -6.388 | 10.234 |
| **-2 +28 +36 rest_L_HATA'** | -3.512 | 5.377 | 0.518 | -14.465 | 7.441 |
| **+46 -56 +46 rest_L_HATA'** | -4.006 | 6.501 | 0.542 | -17.248 | 9.235 |
| **+38 -84 +6 rest_L_fimbria'** | -14.907 | 8.238 | 0.080 | -31.687 | 1.874 |
| **-10 -98 +6 rest_L_fimbria'** | 16.575 | 8.381 | 0.057 | -0.496 | 33.646 |
| **+52 +16 -34 rest_L_fimbria'** | -9.850 | 7.043 | 0.172 | -24.197 | 4.496 |
| **-42 +18 -24 rest_L_fimbria'** | -6.615 | 8.087 | 0.419 | -23.087 | 9.857 |
| **+22 -12 -12 rest_R_CA_3'** | 1.916 | 4.525 | 0.675 | -7.301 | 11.133 |
| **+46 +6 -14 rest_R_CA_3** | 6.597 | 4.563 | 0.158 | -2.698 | 15.892 |
| **+40 +26 -6 rest_R_HP_tail'** | -7.770 | 5.217 | 0.146 | -18.396 | 2.857 |
| **-36 +14 -6 rest_R_HP_tail'** | 7.587 | 6.686 | 0.265 | -6.031 | 21.206 |
| **age** | 0.060 | 0.036 | 0.105 | -0.013 | 0.134 |
| **education year** | 0.512 | 0.130 | 0.000 | 0.248 | 0.777 |

Supp. Table 4: The linear regression analysis (Enter method) showed a univariable association between brain regions with MOCA scores.
